# Supplementary material
Source: publisher site journal article supplement (https://www.dovepress.com/article/362889)
Supplement: Supplementary file 1 [file get_supplementary_file.php]

Supplemental Table 1. Moderate- and high-engagement Participant Usability and Satisfaction Scale responses at month 3

|  | Participant responses  N = 99 | | | | | | |
| --- | --- | --- | --- | --- | --- | --- | --- |
| Participant Usability and Satisfaction Scale, n (%) | Response score 1  (Extremely difficult/ unhelpful/ unsatisfied)a | Response score 2  (Difficult/ unhelpful/ unsatisfied) a | Response score 3  (Somewhat difficult/ unhelpful/ unsatisfied) a | Response score 4  Neutral | Response score 5  (Somewhat easy/ helpful/ satisfied) a | Response score 6  (Easy/ helpful/ satisfied) a | Response score 7  (Extremely easy/ helpful/ satisfied) a |
| 1. How easy or difficult was it for you to apply the patch on your body? | 2 (2) | 3 (3) | 7 (7) | 5 (5) | 16 (16) | 33 (33) | 33 (33) |
| 2. How easy or difficult was it to pair the patch with the mobile phone application (app)? | 1 (1) | 8 (8) | 19 (19) | 12 (12) | 21 (21) | 23 (23) | 15 (15) |
| 3. How easy or difficult was it for you to use the mobile phone application (app)? | 0 (0) | 6 (6) | 10 (10) | 11 (11) | 23 (23) | 29 (29) | 20 (20) |
| 4. How easy or difficult was it for you to use AS? | 2 (2) | 0 (0) | 10 (10) | 15 (15) | 19 (19) | 36 (36) | 17 (17) |
| 5. How helpful or unhelpful was AS in the management of your condition? | 2 (2) | 1 (1) | 4 (4) | 18 (18) | 18 (18) | 37 (37) | 19 (19) |
| 6. How helpful or unhelpful was AS for sharing information with your healthcare professionals to help you understand your treatment plan? | 1 (1) | 2 (2) | 2 (2) | 19 (19) | 13 (13) | 39 (39) | 23 (23) |
| 7. How helpful or unhelpful was AS in improving your discussions with your doctor/treatment team? | 1 (1) | 0 (0) | 3 (3) | 12 (12) | 24 (24) | 40 (40) | 19 (19) |
| 8. Based on your experience, how would you rate your satisfaction with AS? | 1 (1) | 1 (1) | 5 (5) | 12 (12) | 20 (20) | 36 (36) | 24 (24) |

aThe potential response varied depending on the question asked. The difficult/easy responses corresponded with questions 1–4, the unhelpful/helpful responses corresponded with questions 5–7, and the satisfied/unsatisfied responses corresponded with question 8.

App, application; AS, aripiprazole tablets with sensor.

Supplemental Table 2. Effect size of difference between the medium- and high-engagement groups of mean response scores at month 3 for the Participant Usability and Satisfaction Scale.

| Participant Usability and Satisfaction Scale a | Mean of moderate-engagement group responses  n = 51 | Mean of high-engagement group responses  n = 48 | Pb | rc |
| --- | --- | --- | --- | --- |
| Question 1 | 5.3 | 6.0 | 0.05 | 0.22 |
| Question 2 | 4.2 | 5.3 | 0.001 | 0.37 |
| Question 3 | 4.7 | 5.8 | 0.0002 | 0.42 |
| Question 4 | 4.7 | 5.8 | <0.0001 | 0.5 |
| Question 5 | 5.1 | 5.6 | 0.03 | 0.24 |
| Question 6 | 5.3 | 5.8 | 0.03 | 0.25 |
| Question 7 | 5.3 | 5.9 | 0.003 | 0.33 |
| Question 8 | 5.1 | 6.0 | 0.0001 | 0.45 |

aSee Supplemental Table 1 for the full survey.

bP-values were calculated using the Mann-Whitney U test. P < 0.05 indicates that the difference between baseline and endpoint for a given group is significant.

cEffect size (r) was calculated using the rank-biserial correlation. Darker shading indicates larger effect size.
